# Supplementary material for: The Ussing chamber system for measuring intestinal permeability in health and disease
Source: BMC Gastroenterol. 2019 Jun 20;19:98. doi: 10.1186/s12876-019-1002-4 (PMC6585111; doi:10.1186/s12876-019-1002-4)

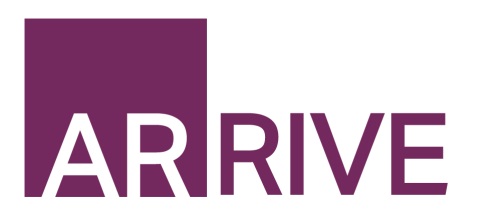


The ARRIVE Guidelines Checklist

Animal Research: Reporting In Vivo Experiments

Carol Kilkenny1, William J Browne2, Innes C Cuthill3, Michael Emerson4 and Douglas G Altman5

*1The National Centre for the Replacement, Refinement and Reduction of Animals in Research, London, UK, 2School of Veterinary Science, University of Bristol, Bristol, UK, 3School of Biological Sciences, University of Bristol, Bristol, UK, 4National Heart and Lung Institute, Imperial College London, UK, 5Centre for Statistics in Medicine, University of Oxford, Oxford, UK.*

|  | | ITEM | RECOMMENDATION | Section/ Paragraph |
| --- | --- | --- | --- | --- |
| 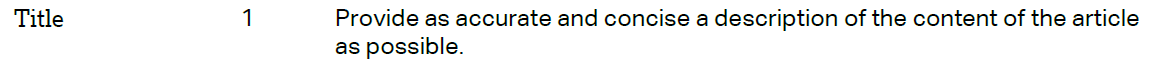 | | | Title |
| 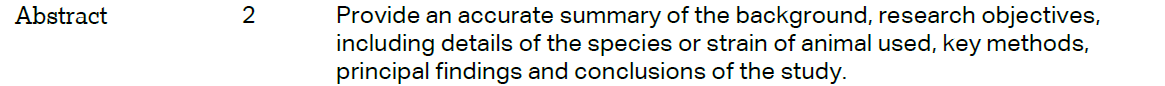 | | | Abstract |
| INTRODUCTION | | |  |
| 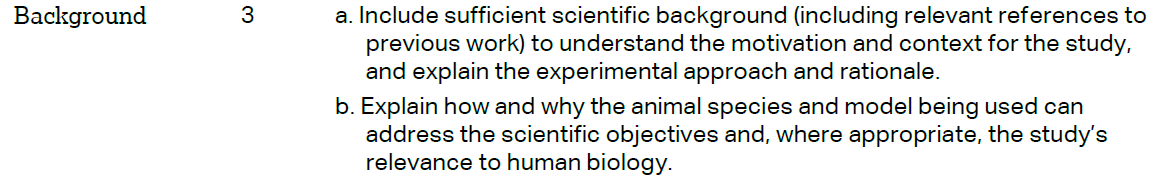 | | | paragraphs 1 -3  paragraph 3 |
| 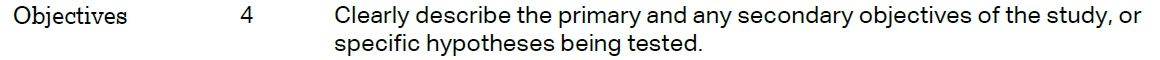 | | | Paragraph 3 |
| METHODS | | |  |
| 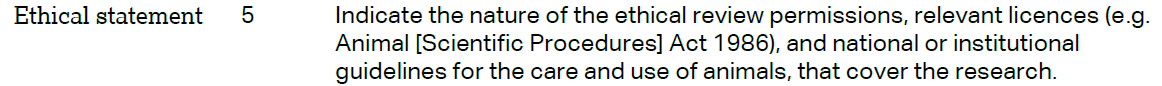 | | | Mice, paragraph 1 |
| 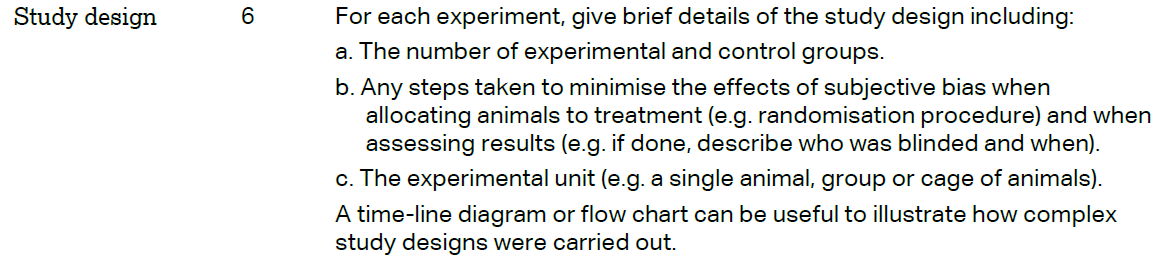 | | | Mice, paragraph 1 and 2  Mice, paragraph 1 and 2  Mice, paragraph 1 and 2 |
| 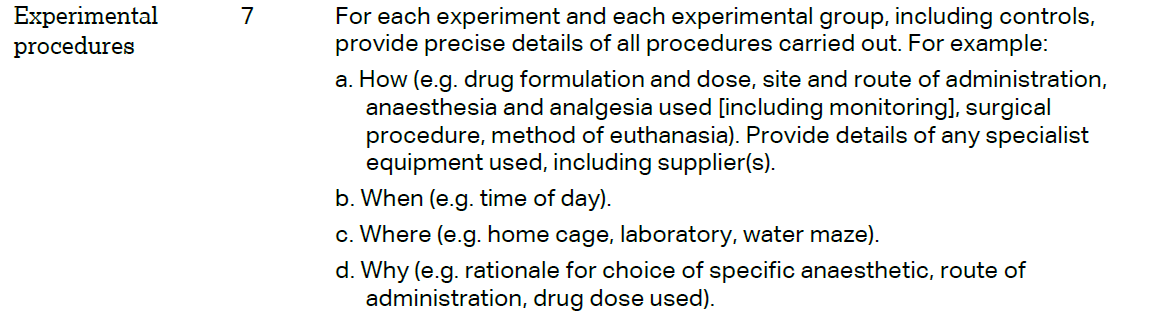 | | | Mice, paragraph 1 and 2  Mice, paragraph 1 and 2  Mice, paragraph 1 |
| 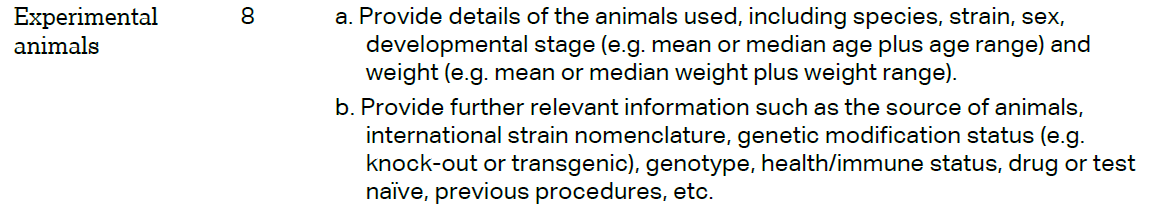 | | | Mice, paragraph 1 and 2  Mice, paragraph 1 and 2 |

The ARRIVE guidelines. Originally published in *PLoS Biology*, June 20101

| 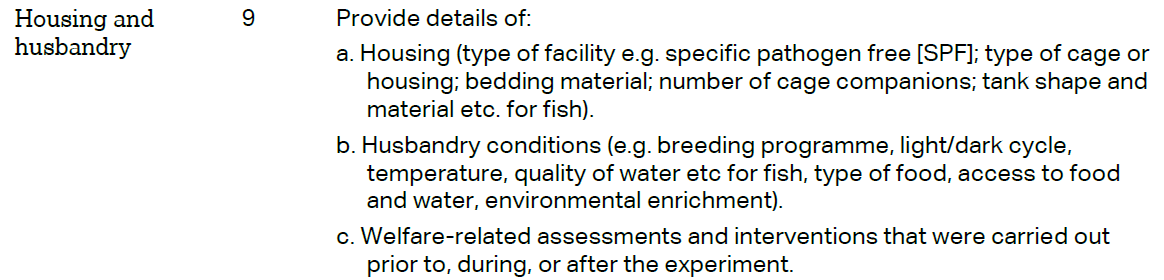 | Mice, paragraph 1  Mice, paragraph 1 and  Mice, paragraph 1 and 2 | |
| --- | --- | --- |
| 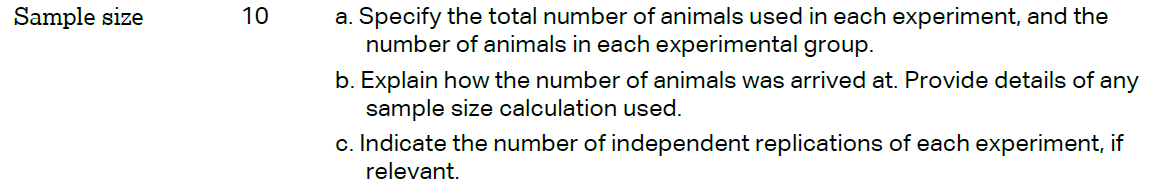 | Mice, paragraph 1 and 2  N/A  Mice, paragraph 2 | |
| 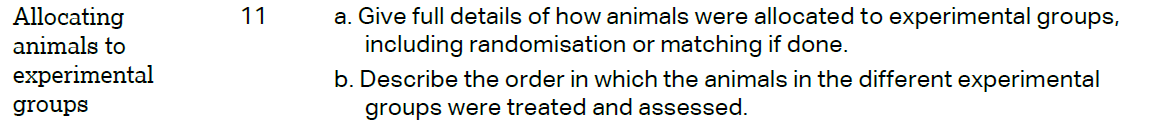 | Mice, paragraph 1 and 2  Mice, paragraph 1 and 2 | |
| 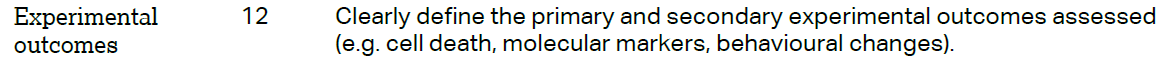 | Mice, paragraph 1 | |
| 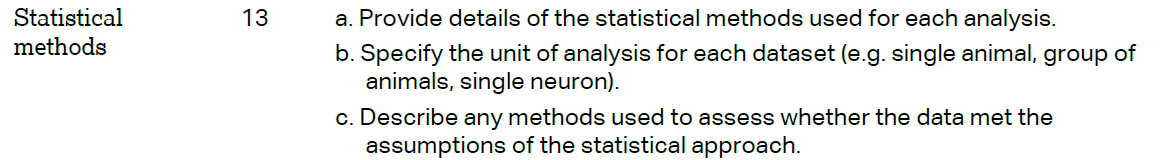 | Statistical analysis  Statistical analysis | |
| RESULTS |  | |
| 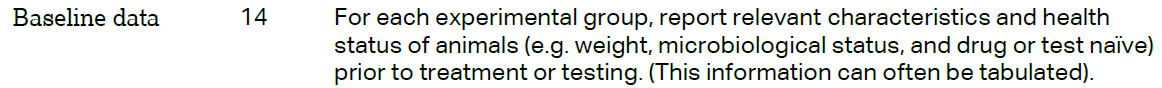 | Mice, paragraph 1 and 2 | |
| 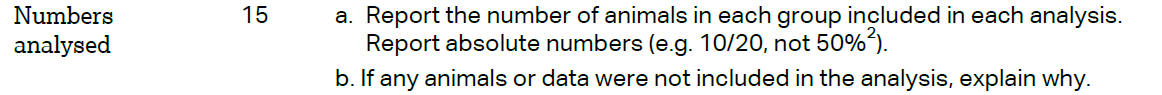 | Mice, paragraph 1 and 2  Electrical measurem-ents, | |
| 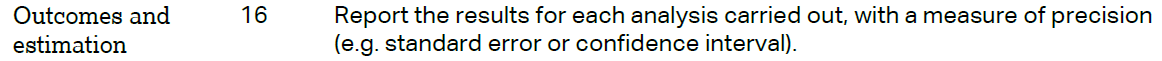 | Paragraphs 1, 2 and 3 | |
| 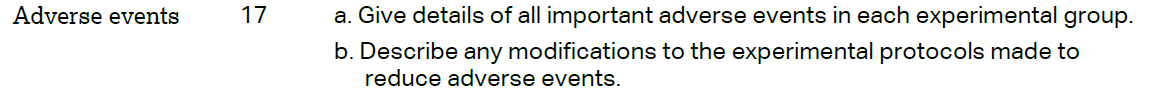 | N/A  N/A | |
| DISCUSSION |  | |
| 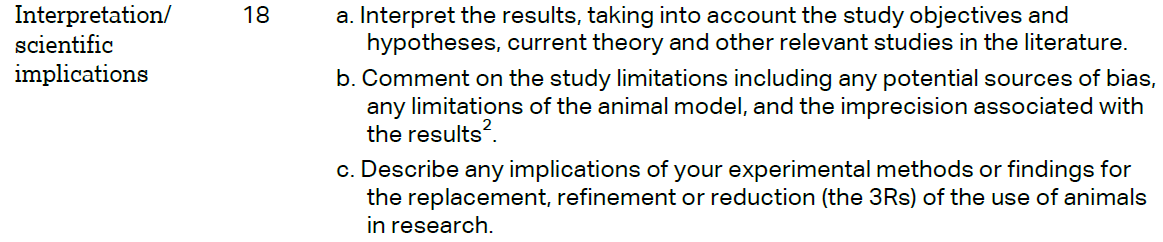 | Paragraphs 1 and 2  N/A  N/A | |
| 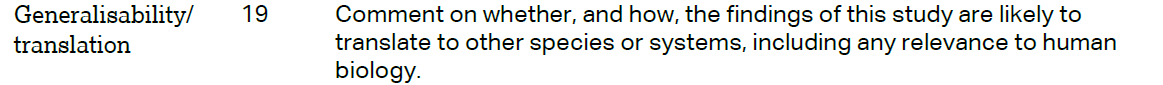 | Paragraph 2 | |
| 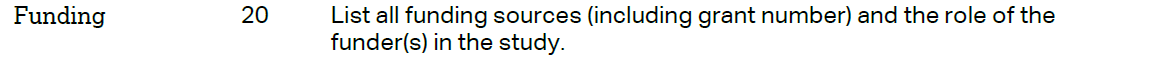 | | Declarations Funding |


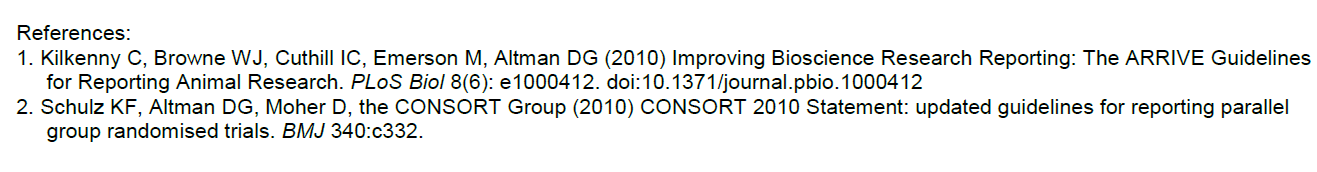

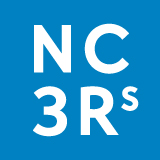

Supplement: Supplementary file 2 — ARRIVE Guidelines Checklist. (DOCX 658 kb) [file 12876_2019_1002_MOESM2_ESM.docx]
